# Supplementary material for: A selective “turn-on” sensor for recognizing In3+ and Zn2+ in respective systems based on imidazo [2,1-Whiazole
Source: Royal Society of Chemistry journal article supplement (doi:10.1039/c9pp00408d), 2020-01-13
Supplement: c9pp00408d1.pdf [file c9pp00408d1.pdf]

## Supporting Information

A selective “turn-on” sensor for recognizing of  $\text{In}^{3+}$  and  $\text{Zn}^{2+}$  in respective system based on imidazo[2,1-*b*]thiazole

Yuankang Xu<sup>a</sup>, Songfang Zhao<sup>b,\*</sup>, Yanxia Zhang<sup>a</sup>, Hanyu Wang<sup>a</sup>, Xiaofeng Yang<sup>a</sup>, Meishan Pei<sup>a</sup>, Guangyou Zhang<sup>a,\*</sup>

<sup>a</sup> School of chemistry and chemical engineering, University of Jinan, Jinan 250022, China.

<sup>b</sup> Henan Sanmenxia Aoke Chemical Industry Co. Ltd., Sanmenxia 472000, China.

\*Corresponding author:

Guangyou Zhang, Ph.D, Professor, E-mail address:  
chm\_zhanggy@ujn.edu.cn.

Songfang Zhao, E-mail address: songfang2008@163.com.

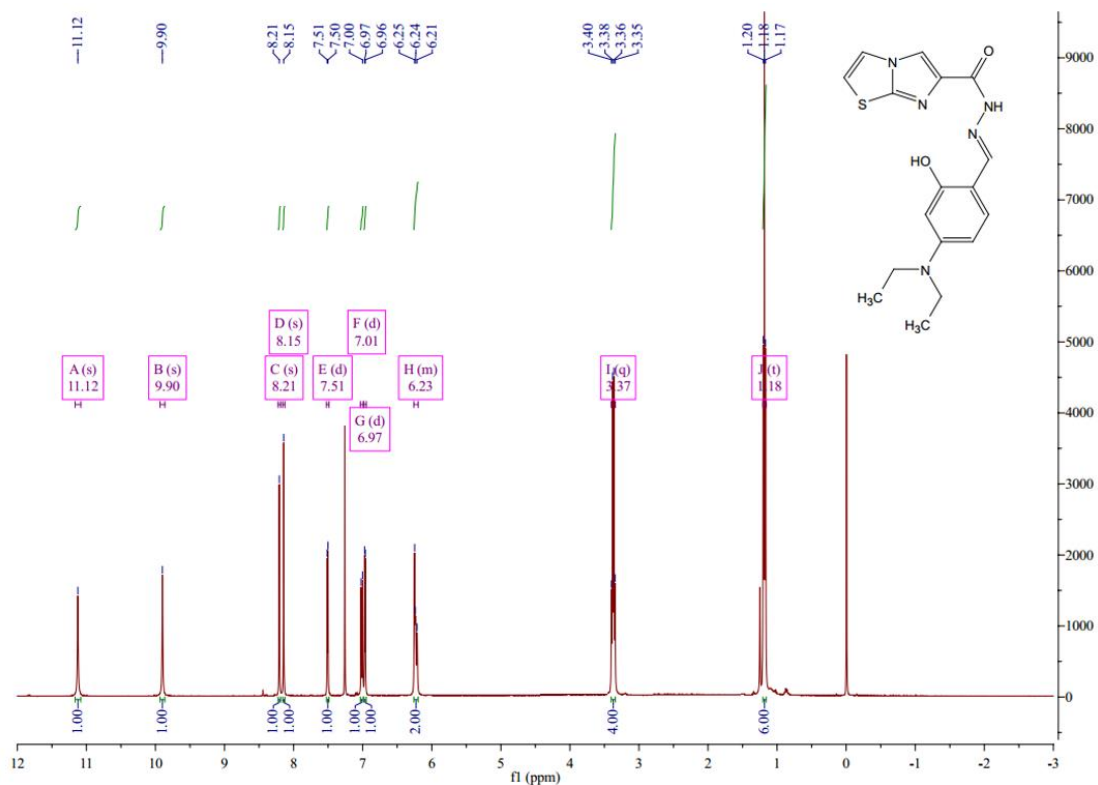

Fig. S1.  $^1\text{H}$  NMR spectrum of X.

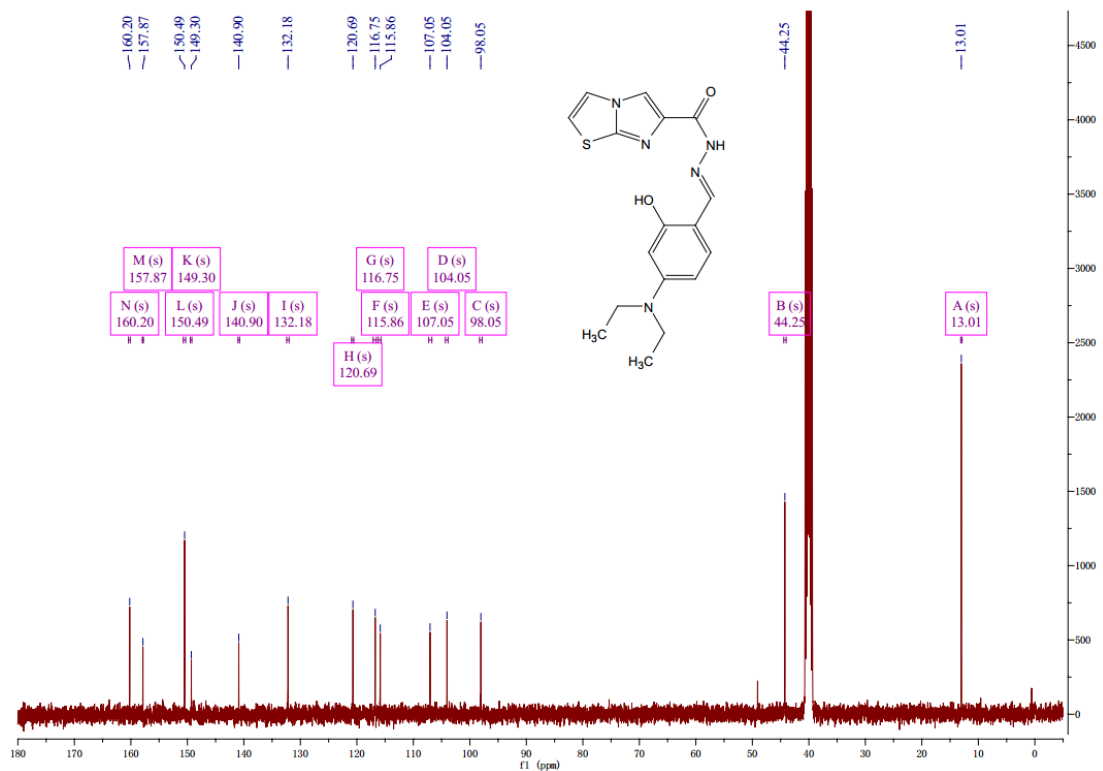

Fig. S2.  $^{13}\text{C}$  NMR spectrum of X.

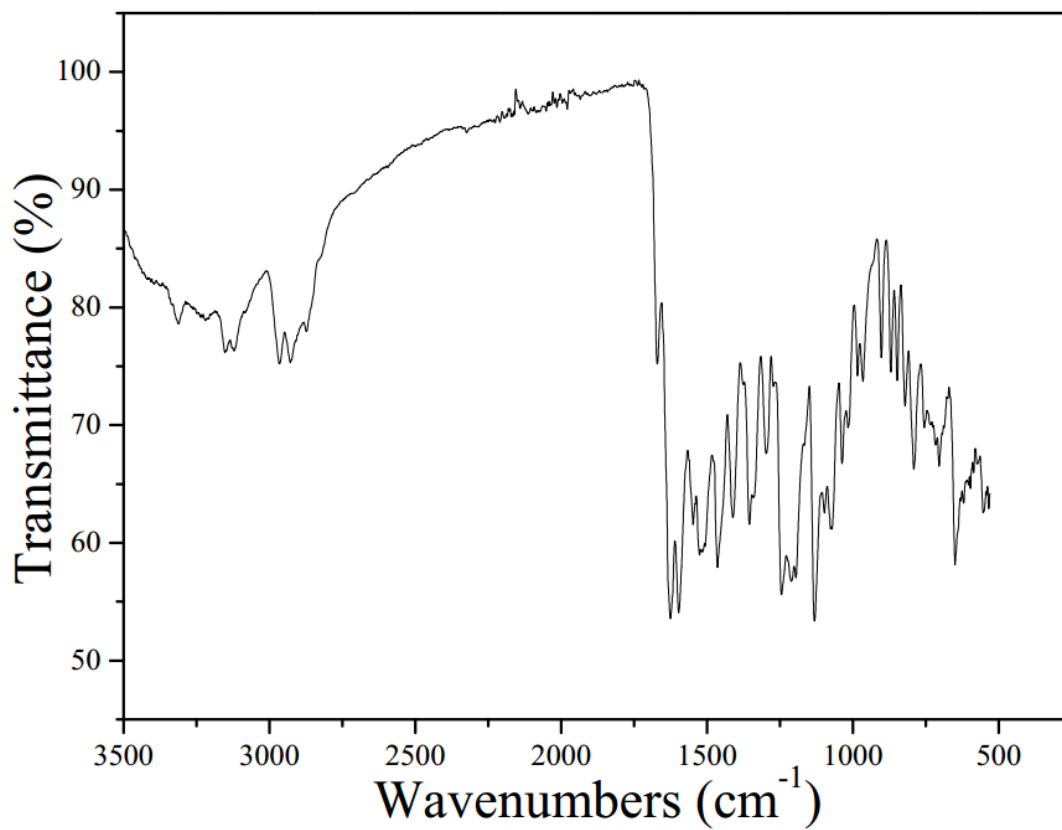

Fig. S3. The FTIR spectra of X.

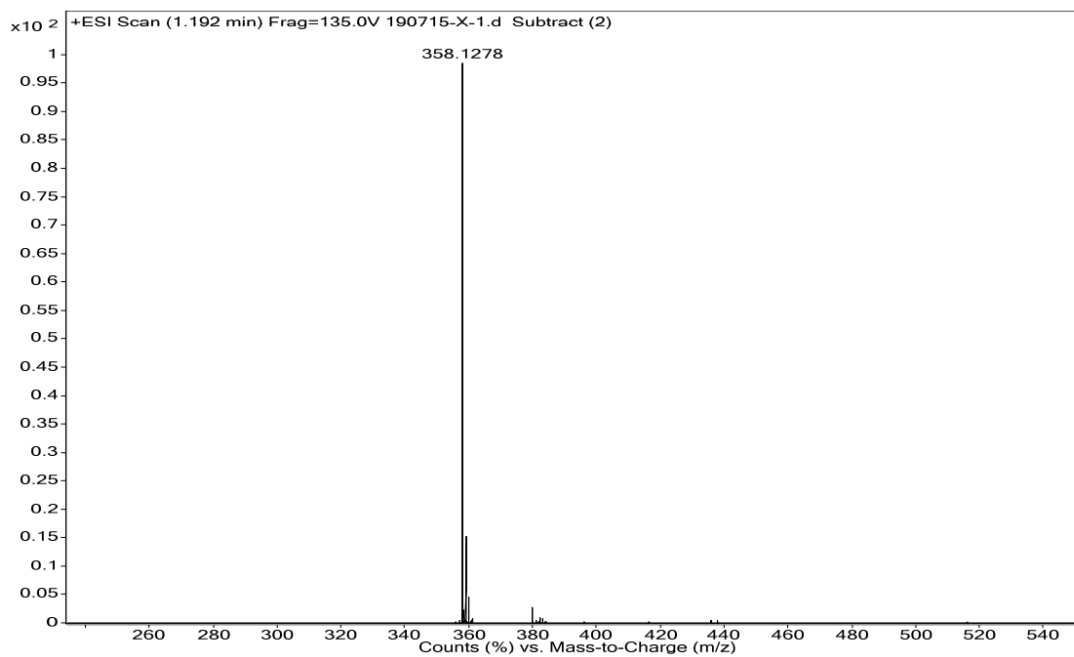

Fig. S4. ESI mass spectrum of X.

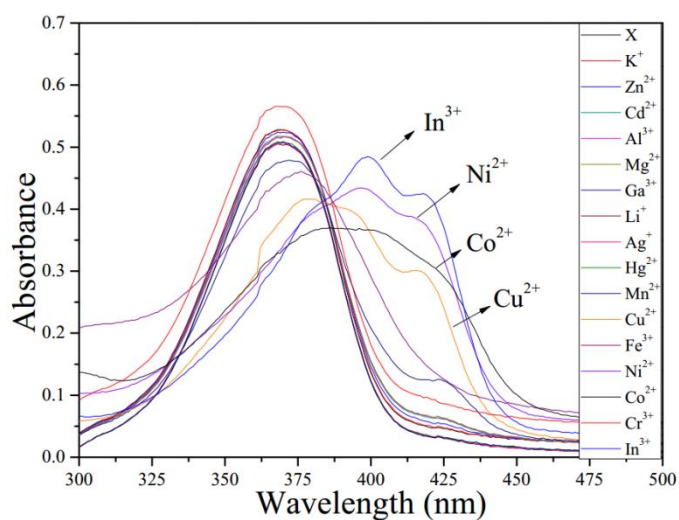

Fig. S5. Absorption spectra of **X** ( $1 \times 10^{-5}$  M) upon the addition of various metal ions (7.5 equiv.) in DMF/H<sub>2</sub>O buffer solution (v/v = 9:1, tris = 10 mM, pH = 7.4).

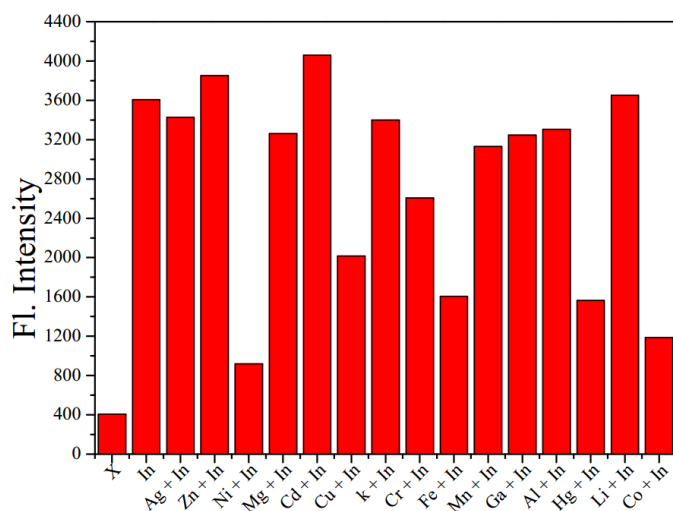

Fig. S6. Fluorescence intensity of **X** and its complexation with In<sup>3+</sup> in the presence of other metal ions (Ag<sup>+</sup>, Zn<sup>2+</sup>, Ni<sup>2+</sup>, Mg<sup>2+</sup>, Cd<sup>2+</sup>, Cu<sup>2+</sup>, K<sup>+</sup>, Cr<sup>3+</sup>, Fe<sup>3+</sup>, Mn<sup>2+</sup>, Ga<sup>3+</sup>, Al<sup>3+</sup>, Hg<sup>2+</sup>, Li<sup>+</sup> and Co<sup>2+</sup>) in DMF/H<sub>2</sub>O buffer solution (v/v = 9:1, tris = 10 mM, pH = 7.4).

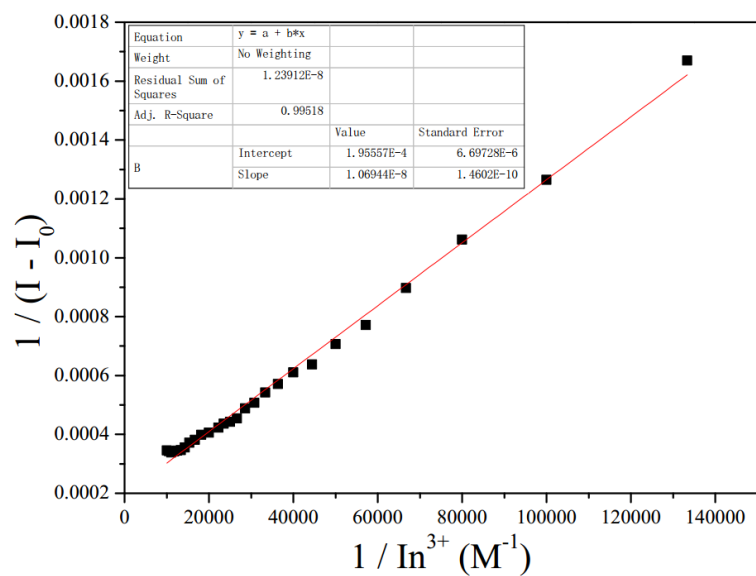

Fig. S7. Benesi-Hilderbrand plot of X with  $\text{In}^{3+}$ .

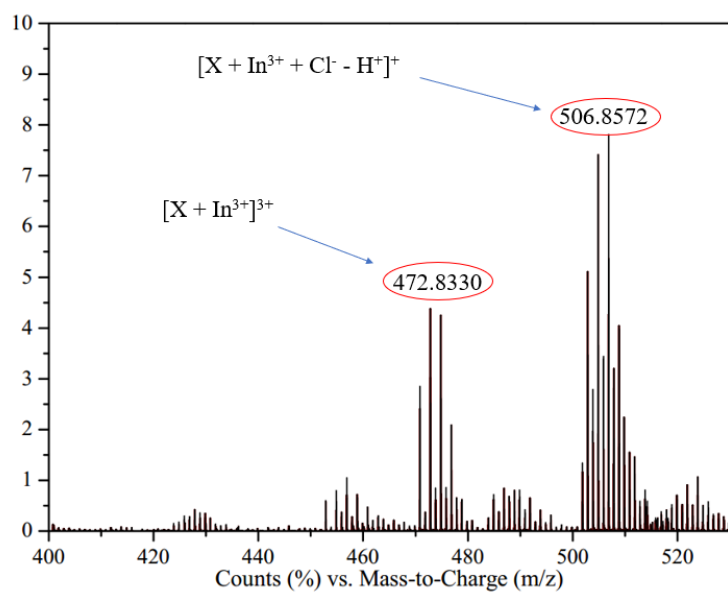

Fig. S8. ESI Mass spectrum of  $\text{X}[\text{In}^{3+}]$ .

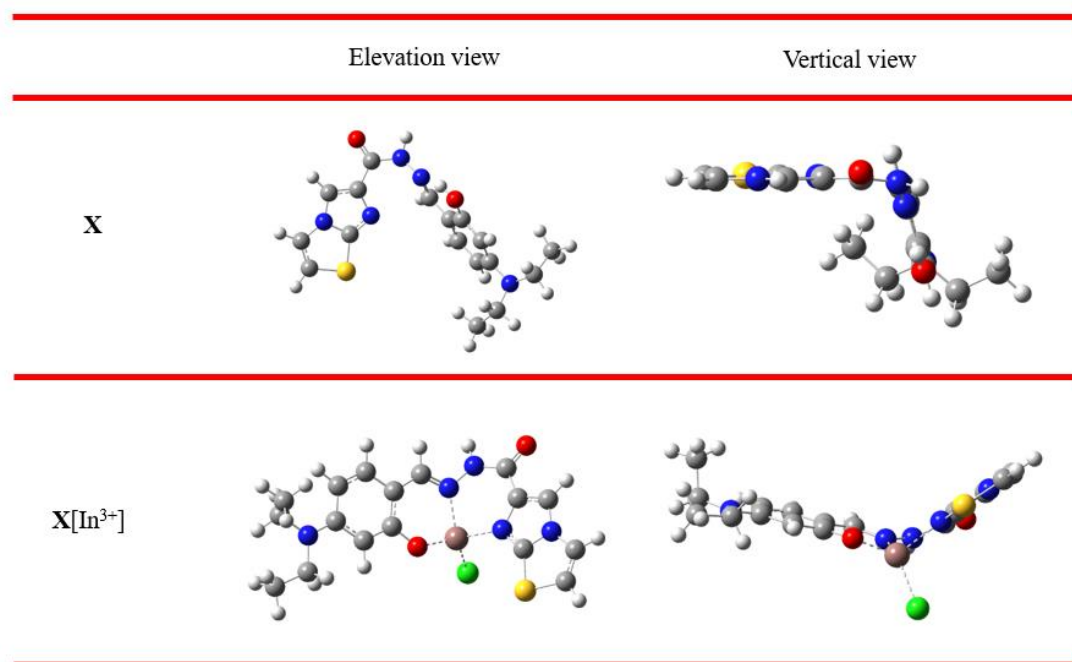

Figure S9. The optimized geometry of **X** and **X[In<sup>3+</sup>]** at the B3LYP level of theory, where the light-gray, red, blue, white, brown and cyan spheres denote C, O, N, H, In and Cl atoms, respectively.

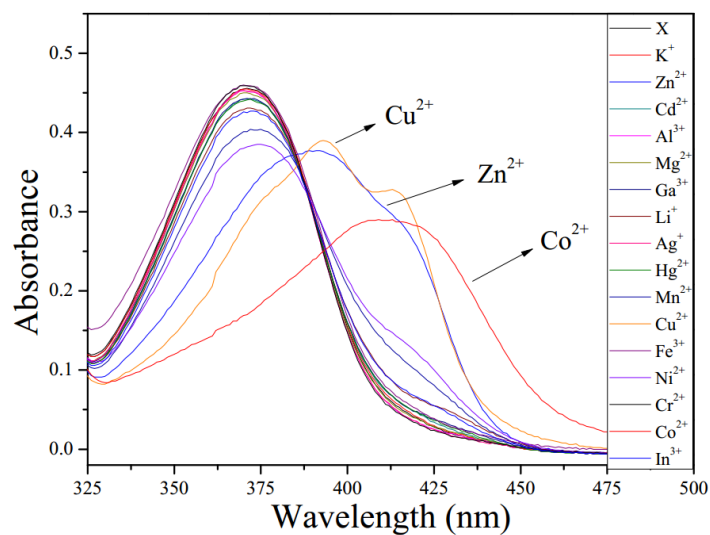

Fig. S10. Absorption spectra of **X** ( $1 \times 10^{-5}$  M) upon the addition of various metal ions (7.5 equiv.) in EtOH/H<sub>2</sub>O buffer solution (v/v = 9:1, tris = 10 mM, pH = 7.4).

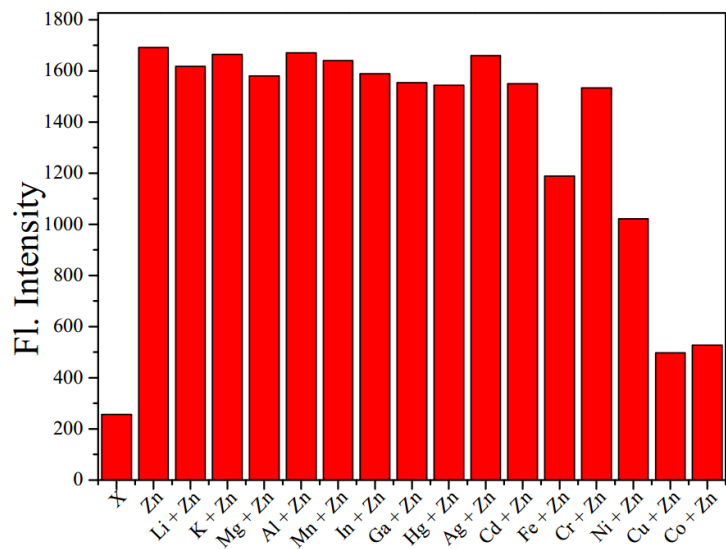

Fig. S11. Fluorescence intensity of **X** and its complexation with  $Zn^{2+}$  in the presence of other metal ions ( $Li^+$ ,  $K^+$ ,  $Mg^{2+}$ ,  $Al^{3+}$ ,  $Mn^{2+}$ ,  $In^{3+}$ ,  $Ga^{3+}$ ,  $Hg^{2+}$ ,  $Ag^+$ ,  $Cd^{2+}$ ,  $Fe^{3+}$ ,  $Cr^{3+}$ ,  $Ni^{2+}$ ,  $Cu^{2+}$  and  $Co^{2+}$ ) in EtOH/H<sub>2</sub>O buffer solution (v/v = 9:1, tris = 10 mM, pH = 7.4).

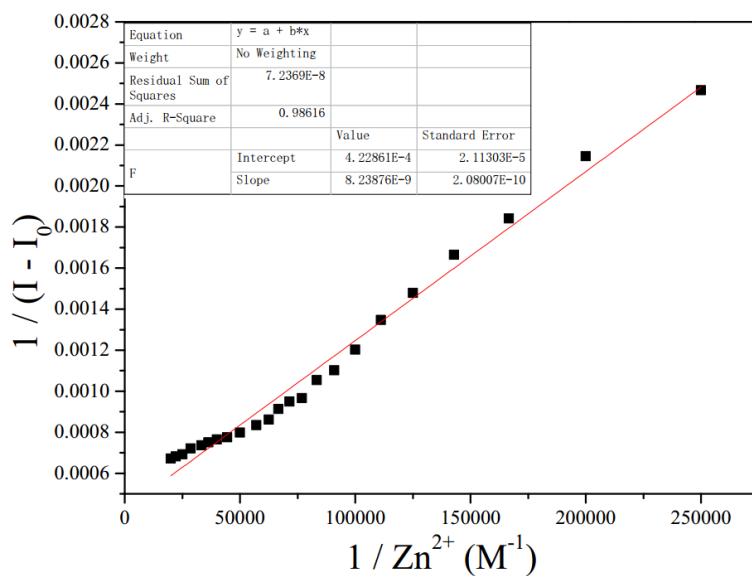

Fig. S12. Benesi-Hilderbrand plot of **X** with  $Zn^{2+}$ .

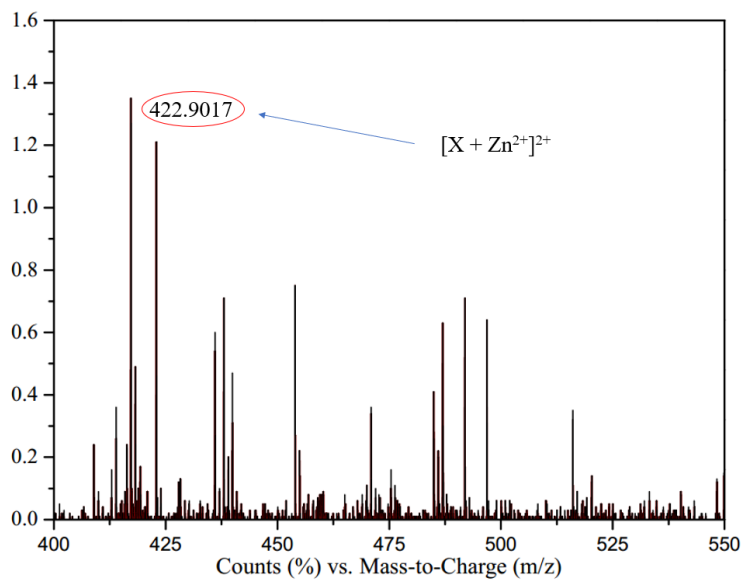

Fig. S13. ESI Mass spectrum of  $X[Zn^{2+}]$ .

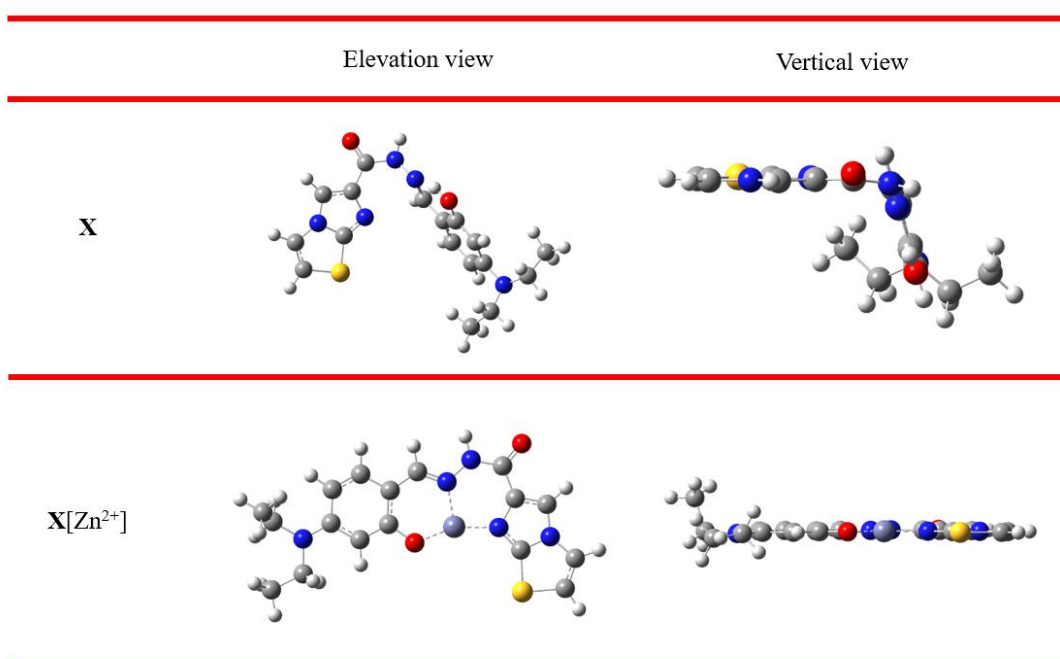

Figure S14. The optimized geometry of **X** and **X[Zn<sup>2+</sup>]** at the B3LYP level of theory, where the light-gray, red, blue, white, dark-gray and cyan spheres denote C, O, N, H, Zn and Cl atoms, respectively.



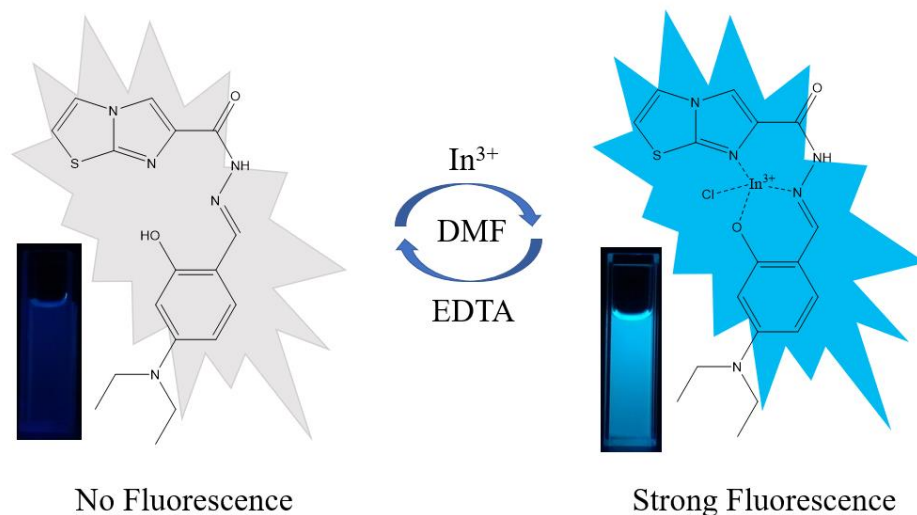

Scheme 2. The proposed binding mode of **X** with  $\text{In}^{3+}$ .

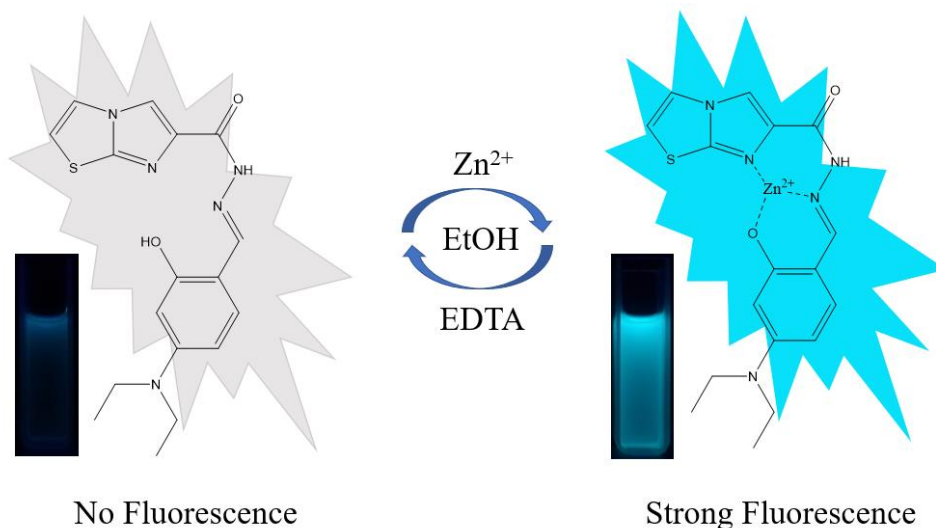

Scheme 3. The proposed binding mode of **X** with  $\text{Zn}^{2+}$ .

Table S1. Comparative study of the analytical performance of **X** with other previous sensors.

| sensor | Reaction media                     | Target ion       | LOD (M)               | $K_a$                               | Ref.      |
|--------|------------------------------------|------------------|-----------------------|-------------------------------------|-----------|
| 1      | DMF/H <sub>2</sub> O (v/v = 9/1)   | $\text{In}^{3+}$ | $1.02 \times 10^{-9}$ | $1.01 \times 10^5 \text{ M}^{-1}$   | This work |
| 2      | MeOH                               | $\text{In}^{3+}$ | $7.9 \times 10^{-6}$  | $1.0 \times 10^8 \text{ M}^{-2}$    | [17]      |
| 3      | EtOH                               | $\text{In}^{3+}$ | $6.1 \times 10^{-7}$  | $8.1 \times 10^4 \text{ M}^{-2}$    | [21]      |
| 4      | MeOH                               | $\text{In}^{3+}$ | $2.0 \times 10^{-6}$  | $1.4 \times 10^5 \text{ M}^{-1}$    | [22]      |
| 5      | DMF                                | $\text{In}^{3+}$ | $5.0 \times 10^{-8}$  | $2.0 \times 10^{10} \text{ M}^{-2}$ | [23]      |
| 6      | EtOH/H <sub>2</sub> O (v/v = 9/1)  | $\text{Zn}^{2+}$ | $5.5 \times 10^{-9}$  | $2.65 \times 10^5 \text{ M}^{-1}$   | This work |
| 7      | EtOH/H <sub>2</sub> O (v/v = 9/1)  | $\text{Zn}^{2+}$ | $2.86 \times 10^{-7}$ | $1.81 \times 10^5 \text{ M}^{-1}$   | [25]      |
| 8      | MeOH/H <sub>2</sub> O (v/v = 1/9)  | $\text{Zn}^{2+}$ | $7.95 \times 10^{-7}$ | $6.0 \times 10^3 \text{ M}^{-1}$    | [26]      |
| 9      | EtOH                               | $\text{Zn}^{2+}$ | $4.0 \times 10^{-8}$  | $6.4 \times 10^4 \text{ M}^{-1}$    | [27]      |
| 10     | EtOH/H <sub>2</sub> O (v/v = 99/1) | $\text{Zn}^{2+}$ | $5.03 \times 10^{-7}$ | $85.7 \text{ M}^{-2}$               | [29]      |

Table S2. Determination of In<sup>3+</sup> concentrations in tap water samples.

| sample | In <sup>3+</sup> added (M) | In <sup>3+</sup> recovered (M) | Recovery (%) | RSD (%) |
|--------|----------------------------|--------------------------------|--------------|---------|
| 1      | 1.0 × 10 <sup>-5</sup>     | 9.28 × 10 <sup>-6</sup>        | 92.8         | 0.74    |
| 2      | 2.0 × 10 <sup>-5</sup>     | 1.88 × 10 <sup>-5</sup>        | 94.1         | 2.36    |
| 3      | 3.0 × 10 <sup>-5</sup>     | 2.74 × 10 <sup>-5</sup>        | 91.2         | 2.27    |
| 4      | 4.0 × 10 <sup>-5</sup>     | 3.68 × 10 <sup>-5</sup>        | 92.3         | 3.51    |

Table S3. Determination of Zn<sup>2+</sup> concentrations in tap water samples.

| sample | Zn <sup>2+</sup> added (M) | Zn <sup>2+</sup> recovered (M) | Recovery (%) | RSD (%) |
|--------|----------------------------|--------------------------------|--------------|---------|
| 1      | 1.0 × 10 <sup>-5</sup>     | 9.73 × 10 <sup>-6</sup>        | 97.3         | 3.01    |
| 2      | 2.0 × 10 <sup>-5</sup>     | 2.08 × 10 <sup>-5</sup>        | 104.1        | 2.39    |
| 3      | 3.0 × 10 <sup>-5</sup>     | 3.19 × 10 <sup>-5</sup>        | 106.2        | 1.50    |

The specific configuration and test process

Stock solutions of the ions (In<sup>3+</sup> and Zn<sup>2+</sup>) were prepared with a concentration of 0.03 M in distilled water and tap water. The probe **X** was dissolved in ethanol/H<sub>2</sub>O (v/v = 9 : 1) buffer solution (10 mM tris, pH = 7.4) and DMF/H<sub>2</sub>O (v/v = 9 : 1) buffer solution (10 mM tris, pH = 7.4) at room temperature with the concentration of 1 × 10<sup>-5</sup> M.

The fluorescence intensity was measured when the In<sup>3+</sup> (distilled water) concentration were 1 × 10<sup>-5</sup> M, 2 × 10<sup>-5</sup> M, 3 × 10<sup>-5</sup> M and 4 × 10<sup>-5</sup> M. Then, the fluorescence intensity was measured with three times when the In<sup>3+</sup> (tap water) concentration were 1 × 10<sup>-5</sup> M, 2 × 10<sup>-5</sup> M, 3 × 10<sup>-5</sup> M and 4 × 10<sup>-5</sup> M.

For example:

Determination of In<sup>3+</sup> concentrations in tap water samples, sample 1, Table S2.

Fluorescence intensity: 751.3 (distilled water, 1 × 10<sup>-5</sup> M); 1281 (distilled water, 2 × 10<sup>-5</sup> M);

1829 (distilled water, 3 × 10<sup>-5</sup> M); 2639 (distilled water, 4 × 10<sup>-5</sup> M).

Linear equation: Y = 621.1X + 72.3

Fluorescence intensity (three times): 645.8 (tap water, 1 × 10<sup>-5</sup> M); 654.5 (tap water, 1 × 10<sup>-5</sup> M);

646.7 (tap water, 1 × 10<sup>-5</sup> M).

The average of fluorescence intensity: (645.8 + 654.5 + 646.7) / 3 = 649

In<sup>3+</sup> recovered (M) = (649 - 72.3) / 621.1 = 0.928; 9.28 × 10<sup>-6</sup> M

Recovery = In<sup>3+</sup> recovered (M) / In<sup>3+</sup> added (M) = 9.28 × 10<sup>-6</sup> / 1.0 × 10<sup>-5</sup> = 92.8%

according to formula  $\sigma = \sqrt{\frac{1}{n-1} \sum_{i=1}^n (x_i - \bar{x})^2}$ . The standard deviation ( $\sigma$ ) was calculated to be 4.78.

RSD =  $\sigma / \bar{x} = 4.78 / 649 = 0.0073$ , 0.73%

The calculation of other data was similar to the example.

Table S4. XYZ coordinate of the optimized structure of **X**.

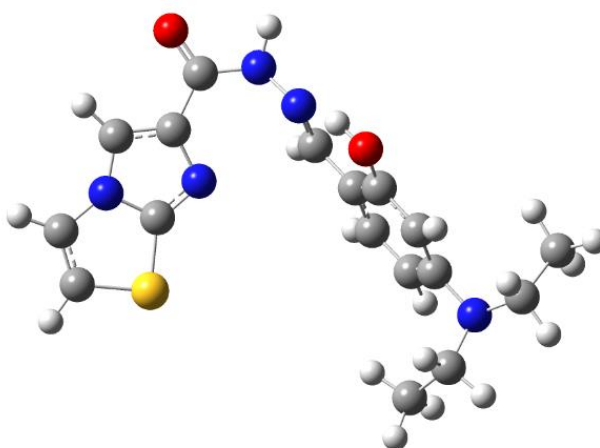

Standard orientation:

| Center Number | Atomic Number | Atomic Type | Coordinates (Angstroms) |           |           |
|---------------|---------------|-------------|-------------------------|-----------|-----------|
|               |               |             | X                       | Y         | Z         |
| 1             | 6             | 0           | -5.286854               | -1.689122 | 1.297058  |
| 2             | 6             | 0           | -5.029600               | -2.846596 | 0.505276  |
| 3             | 6             | 0           | -4.245195               | -0.756948 | -0.580441 |
| 4             | 6             | 0           | -4.389607               | 0.673399  | 1.158164  |
| 5             | 6             | 0           | -3.481765               | 1.171424  | 0.203984  |
| 6             | 6             | 0           | -2.663186               | 2.468481  | 0.342442  |
| 7             | 6             | 0           | -0.170494               | 1.159687  | -0.955533 |
| 8             | 7             | 0           | -5.104271               | -0.432312 | 0.532110  |
| 9             | 7             | 0           | -3.424538               | 0.236037  | -0.949725 |
| 10            | 16            | 0           | -4.468550               | -2.408646 | -1.132110 |
| 11            | 8             | 0           | -2.785476               | 3.182897  | 1.371143  |
| 12            | 7             | 0           | -1.738967               | 2.872038  | -0.727071 |
| 13            | 7             | 0           | -0.473979               | 2.324584  | -0.481918 |
| 14            | 6             | 0           | 1.220999                | 0.557498  | -0.685874 |
| 15            | 6             | 0           | 2.251201                | 1.342095  | 0.147609  |
| 16            | 6             | 0           | 3.517459                | 0.794103  | 0.393001  |
| 17            | 6             | 0           | 3.878749                | -0.592685 | -0.170817 |
| 18            | 6             | 0           | 2.941266                | -1.306666 | -0.929288 |
| 19            | 6             | 0           | 1.549775                | -0.704476 | -1.198952 |
| 20            | 6             | 0           | 5.168273                | -1.954254 | 1.327734  |
| 21            | 6             | 0           | 4.136916                | -3.088863 | 1.184332  |
| 22            | 6             | 0           | 6.191465                | -0.084469 | 0.223477  |
| 23            | 6             | 0           | 6.232026                | 0.739741  | -1.076766 |
| 24            | 7             | 0           | 5.206989                | -1.167506 | 0.086594  |
| 25            | 1             | 0           | -5.139788               | -3.851755 | 0.855155  |
| 26            | 1             | 0           | -5.567763               | -1.723522 | 2.328953  |

|    |   |   |           |           |           |
|----|---|---|-----------|-----------|-----------|
| 27 | 1 | 0 | -4.525303 | 1.034849  | 2.156081  |
| 28 | 1 | 0 | -1.671631 | 3.869490  | -0.750669 |
| 29 | 1 | 0 | -0.886282 | 0.614548  | -1.534645 |
| 30 | 1 | 0 | 0.833986  | -1.249617 | -1.778061 |
| 31 | 1 | 0 | 3.192291  | -2.270214 | -1.321031 |
| 32 | 1 | 0 | 4.233248  | 1.339245  | 0.972109  |
| 33 | 8 | 0 | 1.915715  | 2.629823  | 0.671161  |
| 34 | 1 | 0 | 1.286207  | 3.058720  | 0.086895  |
| 35 | 1 | 0 | 6.135086  | -2.372664 | 1.515100  |
| 36 | 1 | 0 | 4.889872  | -1.320179 | 2.143419  |
| 37 | 1 | 0 | 4.415317  | -3.722938 | 0.368648  |
| 38 | 1 | 0 | 4.108734  | -3.661530 | 2.087747  |
| 39 | 1 | 0 | 3.170103  | -2.670453 | 0.996965  |
| 40 | 1 | 0 | 5.913062  | 0.549607  | 1.039161  |
| 41 | 1 | 0 | 7.158278  | -0.502878 | 0.410846  |
| 42 | 1 | 0 | 5.265214  | 1.158150  | -1.264135 |
| 43 | 1 | 0 | 6.948618  | 1.528073  | -0.977130 |
| 44 | 1 | 0 | 6.510429  | 0.105664  | -1.892449 |

---

Table S5. XYZ coordinate of the optimized structure of  $\mathbf{X}[\text{In}^{3+}]$ .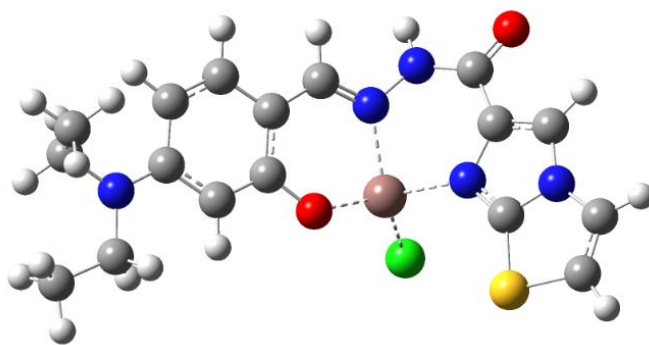

Standard orientation:

| Center Number | Atomic Number | Atomic Type | Coordinates (Angstroms) |           |           |
|---------------|---------------|-------------|-------------------------|-----------|-----------|
|               |               |             | X                       | Y         | Z         |
| 1             | 6             | 0           | 6.237351                | -1.111169 | 0.104403  |
| 2             | 6             | 0           | 5.900047                | -2.426783 | 0.124242  |
| 3             | 6             | 0           | 3.896381                | -0.931753 | 0.055332  |
| 4             | 6             | 0           | 4.868171                | 1.105480  | 0.034367  |
| 5             | 6             | 0           | 3.500757                | 1.284462  | 0.004894  |
| 6             | 6             | 0           | 2.903405                | 2.663629  | -0.033401 |
| 7             | 6             | 0           | -0.789116               | 2.335051  | -0.091511 |
| 8             | 6             | 0           | -1.942531               | 1.527127  | -0.101003 |
| 9             | 6             | 0           | -2.020264               | 0.068346  | -0.081086 |
| 10            | 6             | 0           | -3.222850               | -0.603361 | -0.101810 |
| 11            | 6             | 0           | -4.482661               | 0.101076  | -0.151119 |
| 12            | 6             | 0           | -4.421182               | 1.551995  | -0.150763 |
| 13            | 6             | 0           | -3.219212               | 2.210667  | -0.131842 |
| 14            | 6             | 0           | -5.659692               | -2.073075 | -0.150488 |
| 15            | 6             | 0           | -7.026258               | -2.752283 | -0.304698 |
| 16            | 6             | 0           | -6.964891               | 0.166868  | -0.206641 |
| 17            | 6             | 0           | -7.431265               | 0.579927  | 1.205484  |
| 18            | 16            | 0           | 4.091018                | -2.700452 | 0.094673  |
| 19            | 7             | 0           | 5.100695                | -0.271469 | 0.065571  |
| 20            | 7             | 0           | 2.875737                | -0.026013 | 0.018259  |
| 21            | 8             | 0           | 3.690119                | 3.636644  | -0.037985 |
| 22            | 7             | 0           | 1.535062                | 2.891704  | -0.063755 |
| 23            | 7             | 0           | 0.514107                | 1.916691  | -0.063674 |
| 24            | 8             | 0           | -0.865739               | -0.733998 | -0.038136 |
| 25            | 7             | 0           | -5.661859               | -0.566500 | -0.199356 |
| 26            | 1             | 0           | 7.233658                | -0.690920 | 0.115299  |
| 27            | 1             | 0           | 6.553045                | -3.286981 | 0.154006  |
| 28            | 1             | 0           | 5.643360                | 1.855868  | 0.034547  |
| 29            | 1             | 0           | 1.262980                | 3.875027  | -0.089442 |

|    |    |   |           |           |           |
|----|----|---|-----------|-----------|-----------|
| 30 | 1  | 0 | -0.949078 | 3.413696  | -0.109409 |
| 31 | 1  | 0 | -3.218664 | 3.298314  | -0.137236 |
| 32 | 1  | 0 | -5.330721 | 2.136961  | -0.162299 |
| 33 | 1  | 0 | -3.180573 | -1.683605 | -0.078735 |
| 34 | 1  | 0 | -6.876238 | 1.037514  | -0.863373 |
| 35 | 1  | 0 | -7.708629 | -0.483521 | -0.665282 |
| 36 | 1  | 0 | -8.394498 | 1.098208  | 1.133471  |
| 37 | 1  | 0 | -7.568971 | -0.294818 | 1.850892  |
| 38 | 1  | 0 | -6.718374 | 1.254515  | 1.693799  |
| 39 | 1  | 0 | -5.003830 | -2.429263 | -0.955475 |
| 40 | 1  | 0 | -5.212206 | -2.376778 | 0.806522  |
| 41 | 1  | 0 | -7.481847 | -2.562035 | -1.282480 |
| 42 | 1  | 0 | -6.869616 | -3.834523 | -0.226820 |
| 43 | 1  | 0 | -7.733792 | -2.471010 | 0.482004  |
| 44 | 49 | 0 | 0.878608  | -0.049515 | -0.021454 |
| 45 | 17 | 0 | 1.126325  | -1.484262 | 0.000000  |

---

Table S6. XYZ coordinate of the optimized structure of  $\mathbf{X}[\text{Zn}^{2+}]$ .

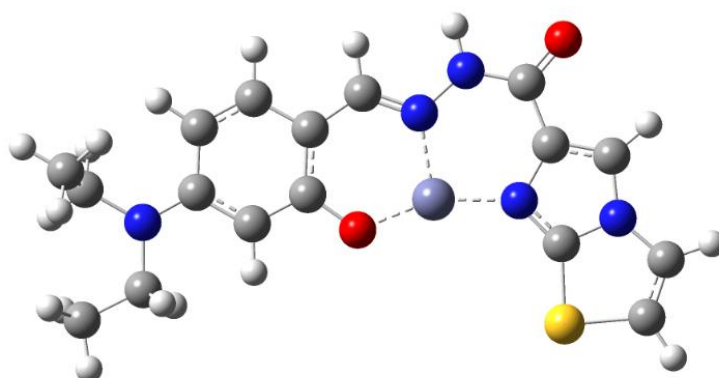

Standard orientation:

| Center Number | Atomic Number | Atomic Type | Coordinates (Angstroms) |           |           |
|---------------|---------------|-------------|-------------------------|-----------|-----------|
|               |               |             | X                       | Y         | Z         |
| 1             | 6             | 0           | 9.155514                | -0.587574 | -0.124890 |
| 2             | 6             | 0           | 9.502229                | -2.358469 | -0.107720 |
| 3             | 6             | 0           | 6.794288                | -1.235770 | -0.019087 |
| 4             | 6             | 0           | 6.525207                | 1.863029  | -0.062636 |
| 5             | 6             | 0           | 5.087452                | 1.654306  | -0.099225 |
| 6             | 6             | 0           | 3.445473                | 2.971061  | -0.044245 |
| 7             | 6             | 0           | -1.469868               | 3.072750  | 0.133254  |
| 8             | 6             | 0           | -2.893709               | 1.329677  | 0.246067  |
| 9             | 6             | 0           | -3.163982               | -0.879914 | 0.332556  |
| 10            | 6             | 0           | -5.163436               | -1.201640 | -0.003338 |
| 11            | 6             | 0           | -6.499834               | -0.246889 | -0.115617 |
| 12            | 6             | 0           | -6.543304               | 1.519982  | -0.271853 |
| 13            | 6             | 0           | -5.166845               | 2.256026  | -0.307351 |
| 14            | 6             | 0           | -7.716503               | -2.790149 | 0.082132  |
| 15            | 6             | 0           | -8.996326               | -3.450589 | -0.463278 |
| 16            | 6             | 0           | -9.164387               | 0.955448  | -0.277837 |
| 17            | 6             | 0           | -10.463495              | 0.713459  | 0.512959  |
| 18            | 16            | 0           | 7.828092                | -2.724789 | -0.034339 |
| 19            | 7             | 0           | 7.726180                | 0.255221  | -0.082492 |
| 20            | 7             | 0           | 4.856363                | -0.518551 | 0.024669  |
| 21            | 8             | 0           | 4.082139                | 4.054808  | -0.105230 |
| 22            | 7             | 0           | 2.007828                | 3.274832  | -0.001821 |
| 23            | 7             | 0           | 0.251040                | 1.931793  | 0.109397  |
| 24            | 8             | 0           | -2.002454               | -1.705925 | 0.216551  |
| 25            | 7             | 0           | -7.864524               | -0.792929 | -0.096571 |
| 26            | 1             | 0           | 10.028048               | 0.030078  | -0.170614 |
| 27            | 1             | 0           | 10.396130               | -2.945999 | -0.133176 |
| 28            | 1             | 0           | 6.934056                | 2.851157  | -0.025955 |

|    |    |   |            |           |           |
|----|----|---|------------|-----------|-----------|
| 29 | 1  | 0 | 1.786589   | 4.249715  | -0.027442 |
| 30 | 1  | 0 | -1.630609  | 4.130162  | 0.102547  |
| 31 | 1  | 0 | -5.193490  | 3.283629  | -0.604372 |
| 32 | 1  | 0 | -7.467604  | 2.054893  | -0.338483 |
| 33 | 1  | 0 | -5.391706  | -2.238347 | -0.137622 |
| 34 | 1  | 0 | -8.662701  | 1.815119  | 0.114816  |
| 35 | 1  | 0 | -9.399652  | 1.119639  | -1.308658 |
| 36 | 1  | 0 | -11.289730 | 1.134303  | -0.021012 |
| 37 | 1  | 0 | -10.616179 | -0.338561 | 0.634781  |
| 38 | 1  | 0 | -10.387203 | 1.176500  | 1.474558  |
| 39 | 1  | 0 | -6.871192  | -3.136420 | -0.475046 |
| 40 | 1  | 0 | -7.593813  | -3.047852 | 1.113362  |
| 41 | 1  | 0 | -9.626228  | -2.702738 | -0.897838 |
| 42 | 1  | 0 | -8.735217  | -4.173512 | -1.207660 |
| 43 | 1  | 0 | -9.516760  | -3.934393 | 0.336710  |
| 44 | 30 | 0 | 1.763375   | -0.836095 | 0.169945  |

---

The calculation process of detection limit:

Scan the blank sample solution 10 times and calculate the standard deviation ( $\sigma$ ) according to formula  $\sigma = \sqrt{\frac{1}{n-1} \sum_{i=1}^n (x_i - \bar{x})^2}$ . The standard deviation ( $\sigma$ ) was calculated to be 0.48.

The fluorescence emission spectra were measured when the  $\text{Zn}^{2+}$  concentration were  $1 \times 10^{-7}$  M,  $2 \times 10^{-7}$  M,  $3 \times 10^{-7}$  M,  $4 \times 10^{-7}$  M,  $5 \times 10^{-7}$  M and  $6 \times 10^{-7}$  M, respectively. As shown in Fig 9 (b) inset, a good linear relationship ( $R^2 = 0.9858$ ) between the fluorescence intensity at 463 nm and concentration of  $\text{Zn}^{2+}$  was obtained.

The slope of the line is  $26 \times 10^7$  M. based on  $3\sigma/s$  equation,  $\text{LOD} = \frac{3 \times 0.48}{26 \times 10^7} = 5.5 \times 10^{-9}$  M.
